# Supplementary material
Source: PubMed Central journal article supplement (PMC3750105)
Supplement: NIHMS481907-supplement-1_si_001.pdf [file NIHMS481907-supplement-1_si_001.pdf]

Kinetic Characterizations of Nitrocefin, Cefoxitin, and Meropenem Hydrolysis  
by  $\beta$ -lactamase of *Mycobacterium tuberculosis*

Carmen Chow, Hua Xu, and John S. Blanchard\*

Department of Biochemistry, Albert Einstein College of Medicine, 1300 Morris Park Avenue,  
Bronx, New York 10461.

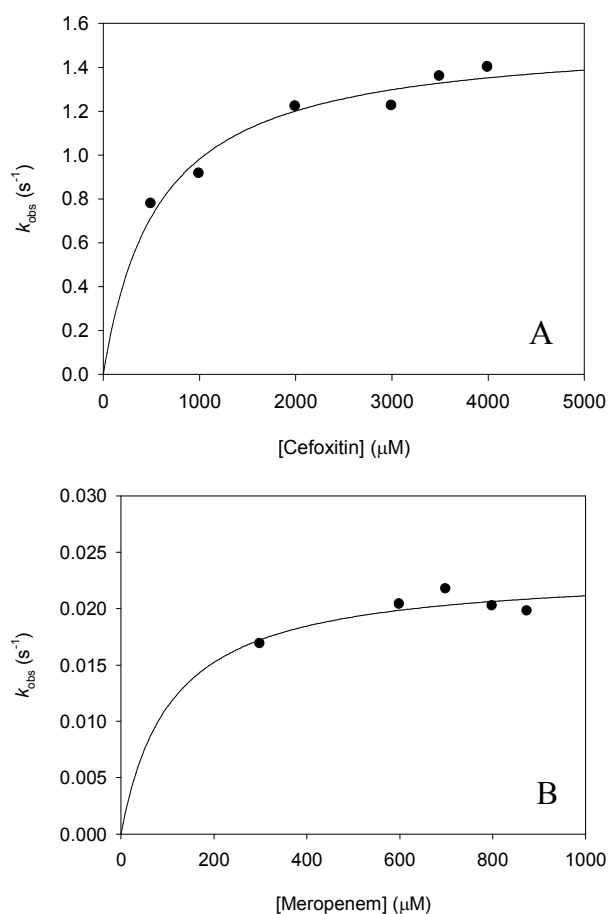

Figure S1. Saturation curves for (A) cefoxitin and (B) meropenem hydrolysis. When  $k_{\text{obs}}$  reaches saturation,  $k_1[S] \gg k_2$  and BlaC is considered sufficiently saturated to produce pseudo-first-order kinetics for cefoxitin hydrolysis. Concentrations of meropenem below 600  $\mu\text{M}$  resulted in poor fit likely due to contributions from binding and  $k_{\text{obs}}$  values could not be obtained. At concentrations of meropenem above 600  $\mu\text{M}$ ,  $k_{\text{obs}}$  values were relatively constant, suggesting that the enzyme is sufficiently saturated.

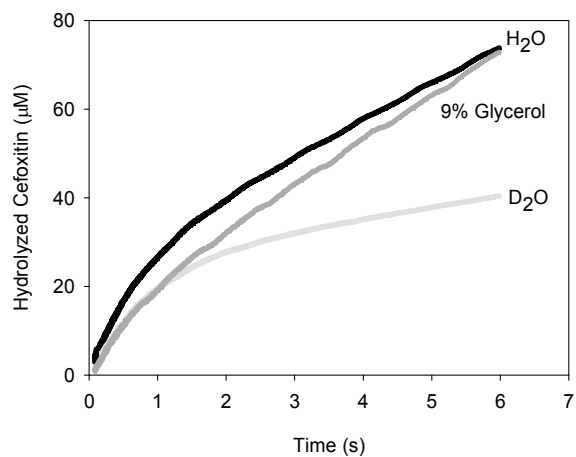

Figure S2. Burst kinetic isotope effects on cefoxitin in H<sub>2</sub>O (black), D<sub>2</sub>O (light gray), and 9% glycerol (gray).

| <b>Table S1. Pre-steady state kinetic fitting</b> |              |                                |
|---------------------------------------------------|--------------|--------------------------------|
| Substrate                                         | Cefoxitin    | Meropenem                      |
| $k_2$ (s <sup>-1</sup> )                          | 1.4 ± 0.01   | (1.9 ± 0.3) × 10 <sup>-2</sup> |
| $k_3$ (s <sup>-1</sup> )                          | 0.4 ± 0.001  | (4.0 ± 1.0) × 10 <sup>-4</sup> |
| $A_0$                                             | 0.67 ± 0.001 | 0.95 ± 0.01                    |
| Pre-steady state $k_{cat}$ (s <sup>-1</sup> )     | 0.30 ± 0.01  | (4.0 ± 1.0) × 10 <sup>-4</sup> |

$k_2$ , rate of acylation;  $k_3$ , rate of deacylation;  $A_0$ , burst amplitude;  $k_{cat}$ , turnover number.
